# Supplementary material for: Comparison of an Offline SPE–GC–MS and Online HS–SPME–GC–MS Method for the Analysis of Volatile Terpenoids in Wine
Source: PubMed Central journal article supplement (PMC7036967; doi:10.3390/molecules25030657), 2020-02-04
Supplement: molecules-25-00657-s001.pdf [file molecules-25-00657-s001.pdf]

Article

# Comparison of an offline-SPE-GC-MS and online-HS-SPME-GC-MS method for the analysis of volatile terpenoids in wine

Cody Williams<sup>1</sup> and Astrid Buica<sup>1,\*</sup>

<sup>1</sup> Department of Viticulture and Oenology, Stellenbosch University, 7600 Stellenbosch, RSA

\* Author to whom correspondence should be addressed: [abuica@sun.ac.za](mailto:abuica@sun.ac.za)

---

**Supplementary Materials:** The following are available online at [www.mdpi.com/xxx/s1](http://www.mdpi.com/xxx/s1).

**Figure S1a and S1b)** The offline-SPE GC-MS chromatogram in spiked model wine (20 µg/L), spiked dearomatised white (20 µg/L) and a real white wine sample (ARV16S/B) respectively. **Figure S1b)** The online-HS-SPME GC-MS chromatogram in spiked model wine (20 µg/L), spiked dearomatised white (20 µg/L) and a real white wine sample (ARV16S/B) respectively.

**Table S1.** Precision and recovery (accuracy) results for the comparison of 3-octanol and 2,6-dimethyl-6-hepten-2-ol as internal standards.

**Table S2.** Description and alcohol concentration of selected white wines used in this study.

**Table S3.** Calculated and literature retention indices for the analyses of terpenoids using both HS-SPME and SPE.

**Table S4.** Accuracy results by means of recovery (%) for terpenoids quantitation at 100 µg/L for SPE and 2 µg/L for SPME for model (MW), white (WW) and red (RW) wine respectively.

**Table S5.** Precision results by means of repeatability (%) for terpenoids quantitation at 100 µg/L for SPE and 2 µg/L for SPME for model (MW), white (WW) and red (RW) wine respectively.

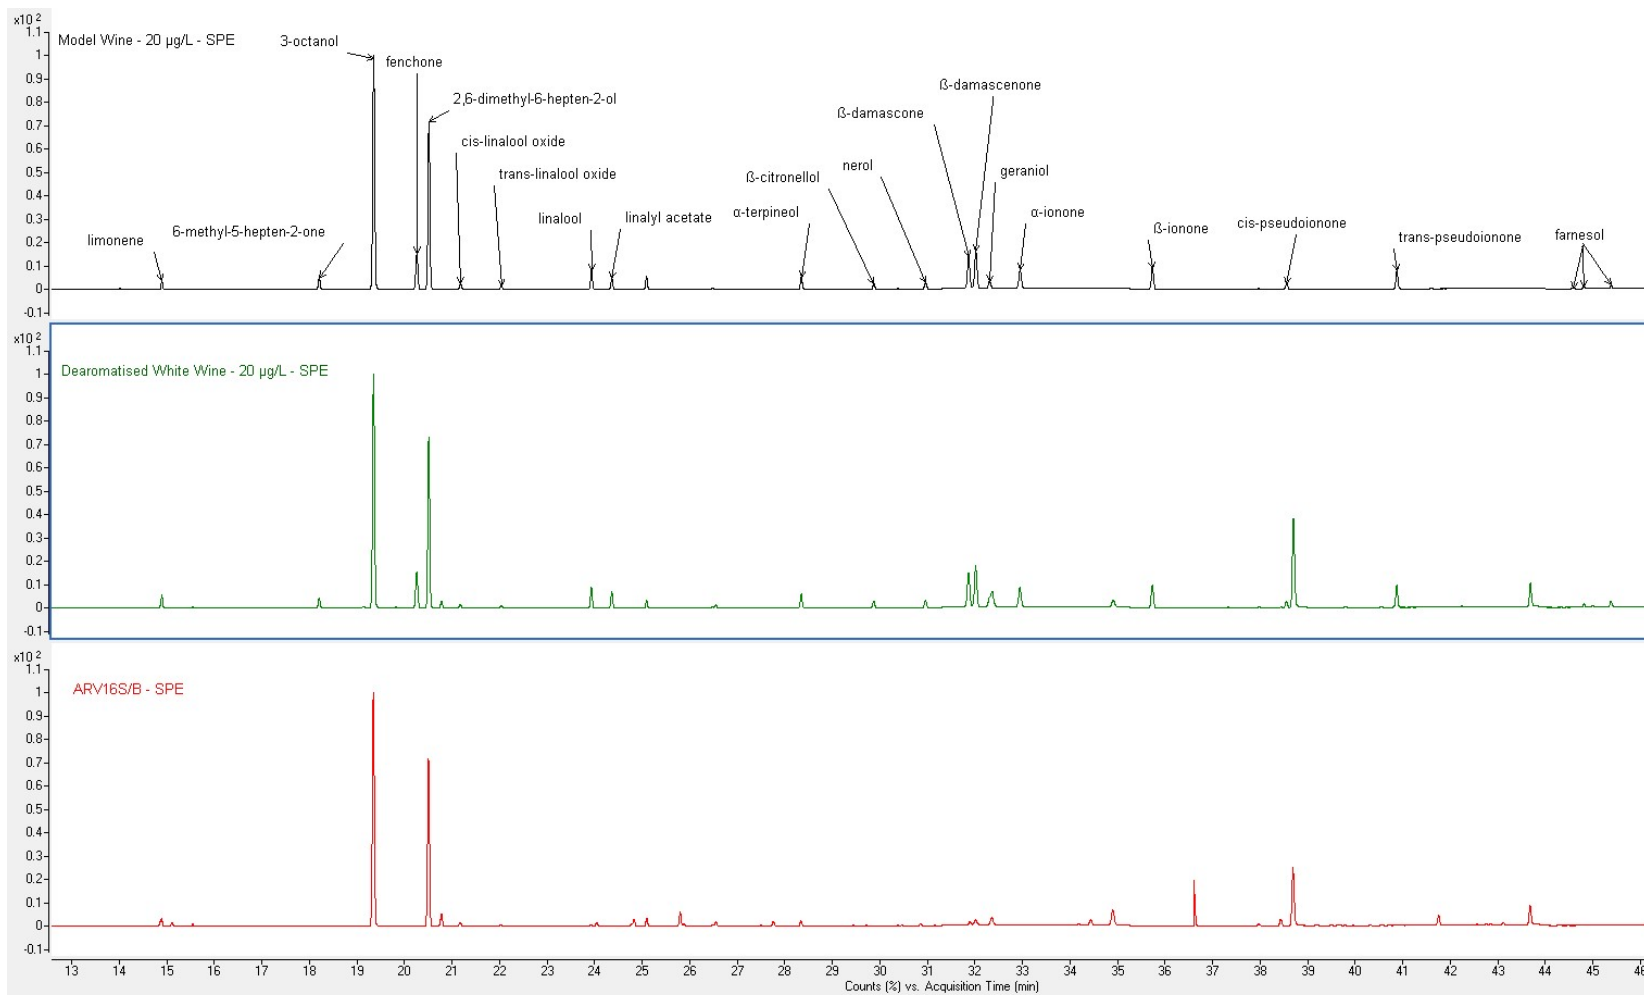

1

2 **Figure S1a)** The offline-SPE GC-MS chromatogram in spiked model wine (20  $\mu\text{g/L}$ ), spiked dearomatized white (20  $\mu\text{g/L}$ ) and a real white wine sample (ARV16S/B) respectively.

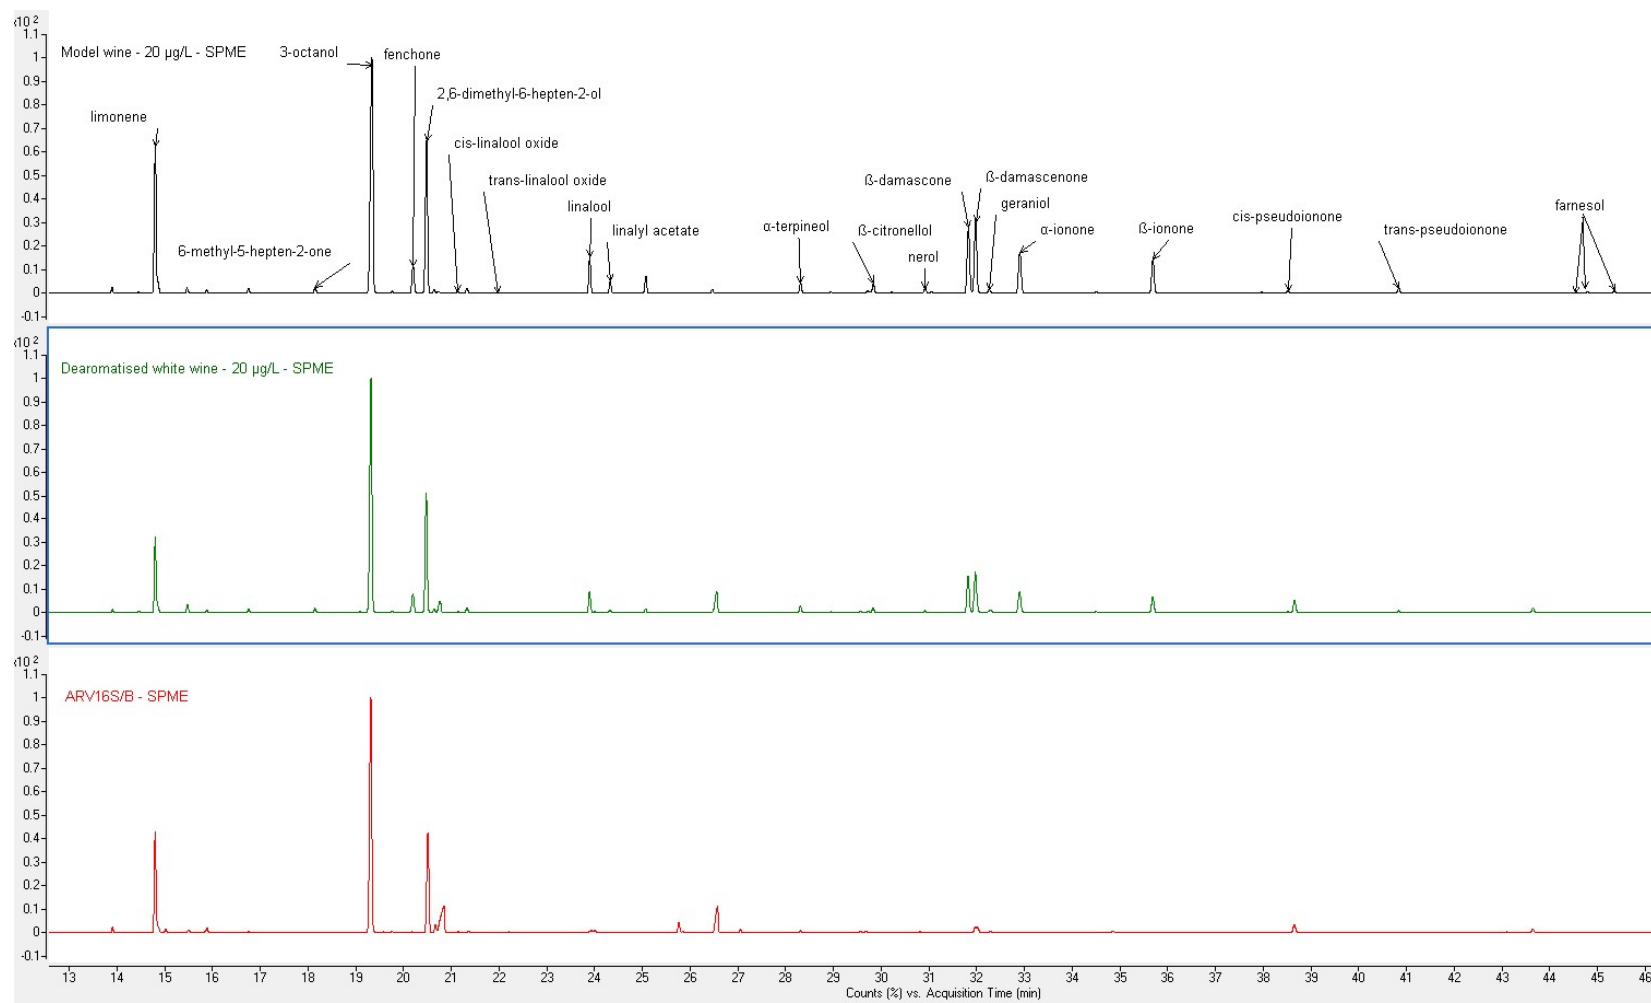

3

4 **Figure S1b.** The online-HS-SPME GC-MS chromatogram in spiked model wine (20 µg/L), spiked dearomatized white (20 µg/L) and a real white wine sample (ARV16S/B)  
5 respectively.

6 **Table S1.** Precision and recovery (accuracy) results for the comparison of 3-octanol and 2,6-dimethyl-6-  
7 hepten-2-ol as internal standards.

|                                          |                               | SPE     |         |         | SPME    |        |         |
|------------------------------------------|-------------------------------|---------|---------|---------|---------|--------|---------|
|                                          |                               | MW      | WW      | RW      | MW      | WW     | RW      |
| 3-Octanol<br>(IS-1)                      | Precision <sup>a</sup> (%)    | 10.99   | 7.36    | 9.93    | 8.56    | 8.51   | 5.08    |
|                                          | Rt (%)                        | 0.00591 | 0.00554 | 0.00635 | 0.00851 | 0.0106 | 0.00687 |
|                                          | R <sup>2</sup> (min)          | 0.9954  | 0.9934  | 0.9853  | 0.9798  | 0.9907 | 0.9434  |
|                                          | R <sup>2</sup> (max)          | 0.9997  | 0.9993  | 0.9998  | 0.9997  | 0.9998 | 0.9999  |
|                                          | Recovery -<br>min (%)         | 83.20   | 81.03   | 89.81   | 88.96   | 87.32  | 82.37   |
|                                          | Recovery -<br>max (%)         | 103.69  | 118.7   | 118.9   | 112.17  | 108.84 | 110.34  |
| 2,6-dimethyl-<br>6-hepten-2-ol<br>(IS-2) | Precision <sup>a</sup><br>(%) | 12.63   | 7.96    | 11.83   | 12.89   | 9.908  | 6.054   |
|                                          | Retention<br>time RSD (%)     | 0.00724 | 0.00469 | 0.00717 | 0.00685 | 0.0125 | 0.00737 |
|                                          | R <sup>2</sup> (min)          | 0.9912  | 0.9812  | 0.9839  | 0.9506  | 0.9814 | 0.9638  |
|                                          | R <sup>2</sup> (max)          | 0.9994  | 0.9997  | 0.9988  | 0.9983  | 0.9997 | 0.9996  |
|                                          | Recovery -<br>min (%)         | 82.53   | 20.17   | 91.43   | 88.09   | 86.48  | 89.31   |
|                                          | Recovery -<br>max (%)         | 101.91  | 134.67  | 136.5   | 149.89  | 148.25 | 149.31  |

8 <sup>a</sup> – Refers to the combined sample preparation and instrumental repeatability RSD (%)

9 <sup>b</sup> – Rt refers to the retention time RSD (%)

10  
11  
12  
13  
14  
15  
16  
17  
18  
19  
20  
21  
22  
23  
24  
25  
26  
27

28 **Table S2.** Description and alcohol concentration of selected white wines used in this study.

| Sample Code | Cultivar         | Vintage   | Alcohol (%) |
|-------------|------------------|-----------|-------------|
| FLY16S      | Solaris          | 2016      | 14.5        |
| ARV16S      | Solaris          | 2016      | 14.0        |
| ANI16/17S   | Solaris          | 2016/2017 | 14.5        |
| JCB16CH     | Chardonnay       | 2016      | 12.5        |
| FRN17SB     | Sauvignon Blanc  | 2017      | 12.5        |
| FLK17AL     | Albariño         | 2017      | 13.0        |
| KZC18CB     | Chenin Blanc     | 2018      | 13.0        |
| KLA16S      | Solaris          | 2016      | 16.0        |
| ORB17AL     | Albariño         | 2017      | 12.5        |
| LNC17SB     | Sauvignon Blanc  | 2017      | 11.5        |
| ARV16S/B    | Solaris Barrique | 2016      | 14.0        |
| GWZ19C      | Gewürztraminer   | 2019      | 11.0        |
| GWC19E      | Gewürztraminer   | 2019      | 11.0        |
| MRF17SB     | Sauvignon Blanc  | 2017      | 13.5        |

29 **Table S3.** Calculated (cRI) and literature retention indices (RI) for the analyses of terpenoids using both  
30 online HS-SPME and offline-SPE sample preparation methods.

| Compound                                | RT (min) | cRI     | RI     | Ions (m/z) |      |
|-----------------------------------------|----------|---------|--------|------------|------|
|                                         |          | (calc.) | (lit.) | Quant      | Qual |
| (R)-(+)-Limonene                        | 14.891   | 1220    | 1219   | 93         | 68   |
| 6-Methyl-5-hepten-2-one                 | 18.207   | 1361    | 1359   | 108        | 111  |
| Fenchone                                | 20.260   | 1435    | 1422   | 152        | 81   |
| <i>cis</i> -Linalool oxide (furanoid)   | 21.178   | 1466    | 1467   | 94         | 111  |
| <i>trans</i> -Linalool oxide (furanoid) | 22.036   | 1495    | 1490   | 94         | 111  |
| Linalool                                | 23.933   | 1562    | 1561   | 71         | 121  |
| Linalyl acetate                         | 24.364   | 1577    | 1575   | 121        | 93   |
| $\alpha$ -terpineol                     | 28.347   | 1724    | 1724   | 136        | 59   |
| $\beta$ -Citronellol                    | 29.872   | 1783    | 1782   | 123        | 95   |
| Nerol                                   | 30.966   | 1821    | 1806   | 123        | 95   |
| $\beta$ -Damascone                      | 31.864   | 1851    | 1824   | 177        | 192  |
| $\beta$ -Damascenone                    | 32.018   | 1856    | 1827   | 121        | 190  |
| Geraniol                                | 32.312   | 1866    | 1832   | 121        | 84   |
| $\alpha$ -Ionone                        | 32.948   | 1887    | 1844   | 121        | 192  |
| $\beta$ -Ionone                         | 35.731   | 1879    | 1889   | 177        | 192  |
| <i>cis</i> -PseudoIonone                | 38.556   | -       | -      | 69         | 124  |
| <i>trans</i> -PseudoIonone              | 40.872   | -       | 2073   | 69         | 124  |
| Farnesol ( <i>Z,E</i> )                 | 44.578   | -       | 2355   | 69         | 81   |
| Farnesol ( <i>E,Z</i> )                 | 44.816   | -       | 2329   | 69         | 81   |
| Farnesol ( <i>E,E</i> )                 | 45.382   | -       | 2355   | 69         | 81   |

32 **Table S4.** Accuracy results by means of recovery (%) for terpenoids quantitation at 100 µg/L for SPE and 2  
 33 µg/L for SPME for model (MW), white (WW) and red (RW) wine respectively.

| Accuracy (recovery, n = 3) | SPE      |     | SPME   |     |
|----------------------------|----------|-----|--------|-----|
|                            | 100 µg/L |     | 2 µg/L |     |
|                            | WW       | RW  | WW     | RW  |
| Limonene                   | 82       | 122 | 107    | 114 |
| 6-Methyl-5-hepten-2-one    | 102      | 109 | 133    | 145 |
| Fenchone                   | 95       | 94  | 124    | 141 |
| cis-Linalool oxide         | 152      | 147 | 84     | 95  |
| trans-Linalool oxide       | 161      | 155 | 98     | 94  |
| Linalool                   | 105      | 92  | 118    | 131 |
| Linalyl acetate            | 75       | 81  | 142    | 123 |
| α-Terpineol                | 110      | 99  | 108    | 124 |
| β-Citronellol              | 106      | 94  | 105    | 152 |
| Nerol                      | 104      | 91  | 104    | 132 |
| β-Damascone                | 95       | 90  | 102    | 128 |
| β-Damascenone              | 93       | 90  | 92     | 106 |
| Geraniol                   | 96       | 86  | 101    | 146 |
| α-Ionone                   | 95       | 92  | 106    | 141 |
| β-Ionone                   | 94       | 89  | 116    | 116 |
| cis-Pseudoionone           | 104      | 93  | 159    | 145 |
| trans-Pseudoionone         | 98       | 91  | 120    | 111 |
| Farnesol (Z,E)             | 83       | 77  | 139    | 128 |
| Farnesol (E,Z)             | 85       | 78  | 108    | 130 |
| Farnesol (E,E)             | 80       | 73  | 120    | 107 |

34

35

36 **Table S5.** Precision results by means of repeatability (%) for terpenoids quantitation at 100 µg/L for SPE  
 37 and 2 µg/L for SPME for model (MW), white (WW) and red (RW) wine respectively.

| Precision (repeatability,<br>n = 3) | SPE      |     |      | SPME   |      |      |
|-------------------------------------|----------|-----|------|--------|------|------|
|                                     | 100 µg/L |     |      | 2 µg/L |      |      |
|                                     | MW       | WW  | RW   | MW     | WW   | RW   |
| Limonene                            | 11.9     | 8.3 | 6.8  | 5.9    | 5.7  | 5.1  |
| 6-Methyl-5-hepten-2-one             | 3.9      | 6.6 | 5.9  | 0.9    | 3.3  | 2.3  |
| Fenchone                            | 3.9      | 6.0 | 5.7  | 1.6    | 3.8  | 8.7  |
| cis-Linalool oxide                  | 2.9      | 6.6 | 3.6  | 2.8    | 1.6  | 4.1  |
| trans-Linalool oxide                | 2.9      | 6.5 | 3.9  | 3.0    | 1.6  | 4.4  |
| Linalool                            | 3.5      | 4.9 | 4.9  | 2.4    | 4.1  | 3.9  |
| Linalyl acetate                     | 3.4      | 6.2 | 6.5  | 9.6    | 13.3 | 9.8  |
| α-Terpineol                         | 2.9      | 4.6 | 5.3  | 6.4    | 0.8  | 3.6  |
| β-Citronellol                       | 3.2      | 4.7 | 4.8  | 4.9    | 4.6  | 6.4  |
| Nerol                               | 3.0      | 4.6 | 6.3  | 5.5    | 5.6  | 8.5  |
| β-Damascone                         | 3.6      | 5.4 | 6.7  | 4.1    | 1.2  | 7.4  |
| β-Damascenone                       | 3.8      | 5.6 | 6.7  | 3.5    | 1.1  | 8.1  |
| Geraniol                            | 2.7      | 5.5 | 6.2  | 4.4    | 8.9  | 16.1 |
| α-Ionone                            | 3.8      | 5.4 | 6.7  | 5.1    | 1.2  | 8.1  |
| β-Ionone                            | 3.5      | 5.3 | 6.9  | 6.7    | 1.5  | 8.2  |
| cis-Pseudoionone                    | 3.7      | 5.4 | 7.9  | 9.0    | 7.0  | 6.0  |
| trans-Pseudoionone                  | 3.3      | 5.7 | 8.0  | 10.0   | 14.6 | 12.7 |
| Farnesol (Z,E)                      | 4.5      | 5.5 | 8.3  | 18.2   | 7.2  | 27.6 |
| Farnesol (E,Z)                      | 3.0      | 6.0 | 8.4  | 17.0   | 16.7 | 15.6 |
| Farnesol (E,E)                      | 3.0      | 6.5 | 10.7 | 18.0   | 15.8 | 14.1 |

38

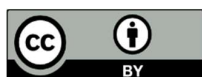

© 2019 by the authors. Submitted for possible open access publication under the terms and conditions of the Creative Commons Attribution (CC BY) license (<http://creativecommons.org/licenses/by/4.0/>).

39
